# Supplementary material for: New uranium(vi) and isothiouronium complexes: synthesis, crystal structure, spectroscopic characterization and a DFT study
Source: Royal Society of Chemistry journal article supplement (doi:10.1039/d0ce00746c), 2020-01-01
Supplement: d0ce00746c1.pdf [file d0ce00746c1.pdf]

Electronic supplementary information

## New uranium(VI) and isothiuronium complexes: synthesis, crystal structure, spectroscopic characterization and a DFT study

E. Grabias<sup>1,2\*</sup>, B. Tarasiuk<sup>3</sup>, A. Dołęga<sup>4</sup>, M. Majdan<sup>3</sup>

<sup>1</sup>*Faculty of Civil Engineering and Architecture, Lublin University of Technology, Nadbystrzycka 40, 20-618 Lublin, Poland.*

<sup>2</sup>*Maria Curie Skłodowska University, Faculty of Mathematics, Physics and Computer Science, 5M. Curie Skłodowska Sq., 20-031 Lublin, Poland*

<sup>3</sup>*Maria Curie Skłodowska University, Faculty of Chemistry, 2 M. Curie Skłodowska Sq., 20-031 Lublin, Poland*

<sup>4</sup>*Gdańsk University of Technology, Faculty of Chemistry, 11/12 G. Narutowicza St., 80-233 Gdańsk, Poland*

\*[ewelinagrabias@gmail.com](mailto:ewelinagrabias@gmail.com)

Table 1S Hydrogen bonds in the studied compounds.

| Involved atoms              | D-H [Å] | H---A [Å] | D---A [Å]  | ∠ D-H---A [°] |
|-----------------------------|---------|-----------|------------|---------------|
| <b>1_ac</b>                 |         |           |            |               |
| N1—H1A---O1                 | 0.88    | 1.88      | 2.7567(19) | 173           |
| N1—H1B---O4                 | 0.88    | 1.9       | 2.695(2)   | 150           |
| N2—H2A---O2                 | 0.88    | 1.91      | 2.7904(19) | 174           |
| N2—H2B---O3 <sup>i</sup>    | 0.88    | 1.91      | 2.7366(19) | 155           |
| N3—H3A---O4 <sup>ii</sup>   | 0.88    | 1.97      | 2.850(2)   | 175           |
| N3—H3B---O2 <sup>iii</sup>  | 0.88    | 1.95      | 2.8256(19) | 174           |
| N4—H4C---O3 <sup>ii</sup>   | 0.88    | 1.9       | 2.7766(19) | 179           |
| N4—H4D---O1 <sup>iv</sup>   | 0.88    | 2.09      | 2.8551(19) | 145           |
| <b>1_Cl</b>                 |         |           |            |               |
| N1—H1B---C11                | 0.90(3) | 2.26(3)   | 3.151(2)   | 172(3)        |
| N2—H2A---C11 <sup>i</sup>   | 0.86(3) | 2.33(3)   | 3.146(2)   | 158(2)        |
| N1—H1A---C11 <sup>ii</sup>  | 0.86(3) | 2.57(3)   | 3.2994(19) | 143(3)        |
| N2—H2B---C11 <sup>iii</sup> | 0.85(3) | 2.38(3)   | 3.200(2)   | 161(2)        |
| <b>1_U</b>                  |         |           |            |               |
| N1—H1B---O9                 | 0.88    | 1.97      | 2.771(6)   | 151           |
| O9—H9A---O6                 | 0.85    | 2.44      | 2.977(7)   | 122           |
| O9—H9A---O10                | 0.85    | 1.87      | 2.684(5)   | 161           |
| N1—H1A---O8 <sup>i</sup>    | 0.88    | 2         | 2.776(6)   | 147           |

## Electronic supplementary information

|                             |         |         |          |         |
|-----------------------------|---------|---------|----------|---------|
| N2—H2D---O3 <sup>i</sup>    | 0.88    | 2.05    | 2.906(5) | 165     |
| O9—H9B---O4 <sup>ii</sup>   | 0.85    | 2.64    | 3.192(6) | 124     |
| O9—H9B---O5 <sup>ii</sup>   | 0.85    | 2.27    | 3.078(7) | 160     |
| N2—H2E---O7 <sup>iii</sup>  | 0.88    | 2.02    | 2.880(6) | 166     |
| <b>2_Cl</b>                 |         |         |          |         |
| N1—H1A---C11                | 0.92(8) | 2.37(8) | 3.183(5) | 147(6)  |
| N2—H2C---C11                | 0.91(6) | 2.46(6) | 3.301(5) | 153(5)  |
| N3—H3A---C12                | 0.84(5) | 2.42(5) | 3.194(5) | 155(4)  |
| N4—H4A---C12                | 0.83(9) | 2.59(9) | 3.229(5) | 135(8)  |
| N1—H1B---C12 <sup>i</sup>   | 0.81(6) | 2.38(6) | 3.168(5) | 167(5)  |
| N2—H2D---C12 <sup>ii</sup>  | 0.93(5) | 2.23(6) | 3.149(5) | 167(4)  |
| N3—H3B---C11 <sup>iii</sup> | 0.76(6) | 2.49(6) | 3.179(5) | 153(6)  |
| N4—H4B---C11 <sup>iv</sup>  | 0.86(6) | 2.31(6) | 3.168(5) | 176(5)  |
| <b>2_U</b>                  |         |         |          |         |
| N1—H1A---C11                | 0.81(7) | 2.99(8) | 3.684(9) | 145(8)  |
| N2—H2C---C11                | 0.87(6) | 2.34(7) | 3.212(8) | 176(7)  |
| N3—H3A---O8                 | 0.86(7) | 1.94(7) | 2.782(9) | 168(8)  |
| N4—H4A---O3                 | 0.82(7) | 2.03(7) | 2.828(9) | 167(8)  |
| N1—H1B---O6 <sup>i</sup>    | 0.79(7) | 2.06(8) | 2.795(9) | 156(10) |
| N2—H2D---C11 <sup>ii</sup>  | 0.80(7) | 2.45(8) | 3.193(8) | 155(8)  |
| N3—H3B---C11 <sup>iii</sup> | 0.87(7) | 2.33(8) | 3.142(7) | 157(9)  |
| N4—H4B---O1 <sup>iv</sup>   | 0.76(7) | 2.57(9) | 2.972(9) | 115(8)  |
| N4—H4B---O1 <sup>v</sup>    | 0.76(7) | 2.28(8) | 2.972(9) | 152(9)  |

Symmetry operations for **1\_ac**: <sup>i</sup>  $x-1, y, z$ ; <sup>ii</sup>  $x, y+1, z$ ; <sup>iii</sup>  $-x, -y+2, -z+1$ ; <sup>iv</sup>  $-x+1, -y+2, -z+1$

Symmetry operations for **1\_U**: <sup>i</sup>  $x+1, y, z$ ; <sup>ii</sup>  $-x+1.5, y+0.5, -z+0.5, z$ ; <sup>iii</sup>  $x+0.5, -y+1.5, z-0.5$

Symmetry operations for **1\_Cl**: <sup>i</sup>  $x, y-1, z$ ; <sup>ii</sup>  $-x+2, -y+1, -z+2$ ; <sup>iii</sup>  $x-1, y-1, z$

Symmetry operations for **2\_Cl**: <sup>i</sup>  $-x+0.5, y-0.5, -z+1.5$ ; <sup>ii</sup>  $-x, -y, -z+1$ ; <sup>iii</sup>  $x, -y, z-0.5$ ; <sup>iv</sup>  $x-1, -y, z-0.5$

Symmetry operations for **2\_U**: <sup>i</sup>  $x+1, y+2, z$ ; <sup>ii</sup>  $-x+3.5, y-0.5, -z+1.5$ ; <sup>iii</sup>  $x-1, y-1, z$ ; <sup>iv</sup>  $x, y+1, z$ ; <sup>v</sup>  $-x+2, -y+1, -z+2$

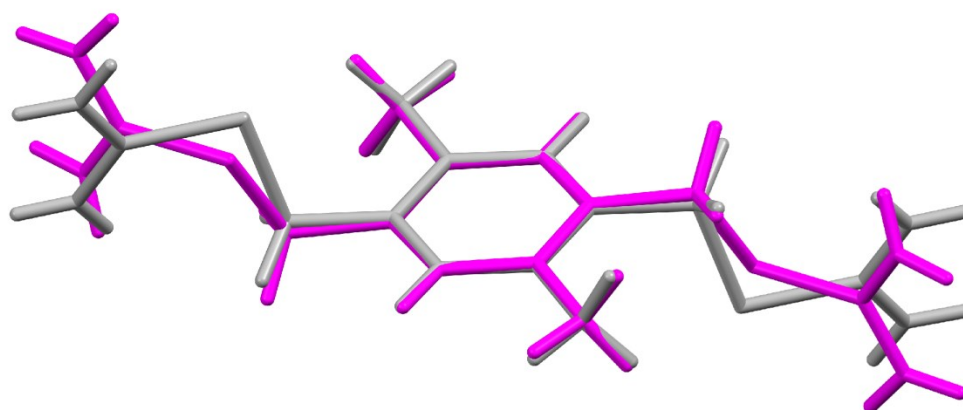

Figure 1S The overlay of the structures of isothiuronium cations in **1\_ac** (acetate, grey) and **1\_Cl** (chloride, magenta).

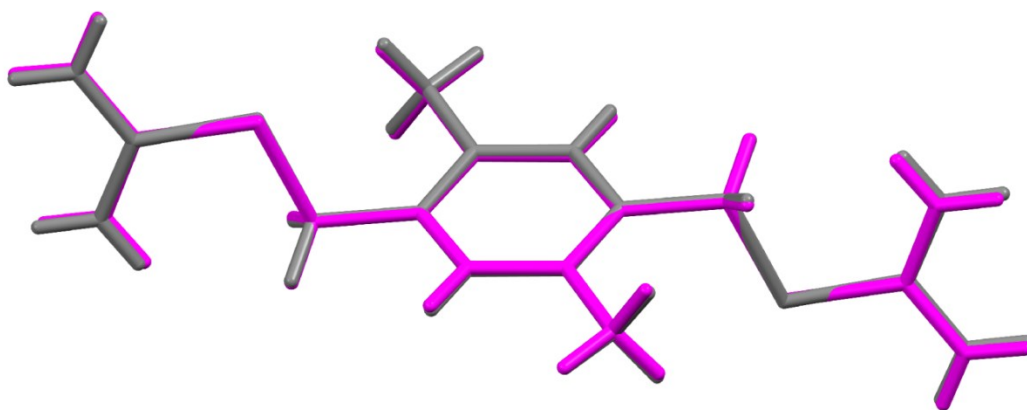

Figure 2S The overlay of the structures of isothiuronium cations in **1\_ac**(acetate, grey) and **1\_U** (magenta).

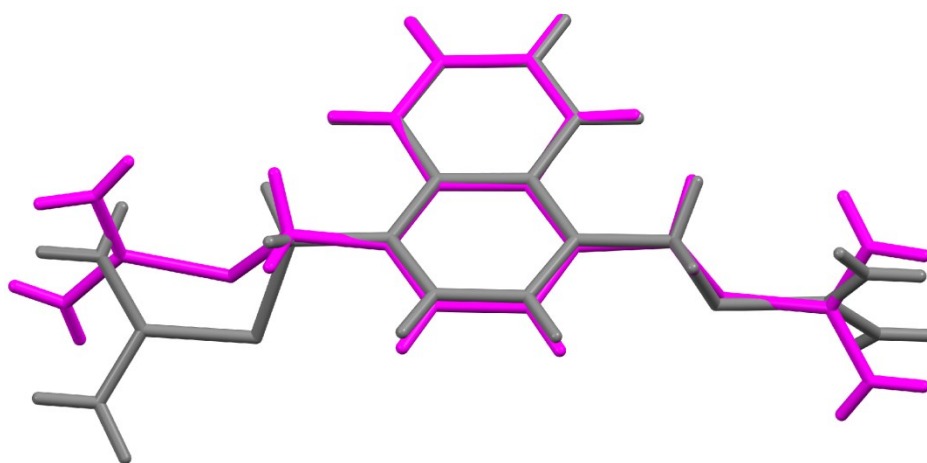

Figure 3S The overlay of the structures of isothiuronium cations in **2\_Cl** (chloride, grey) and **2\_U**(magenta).

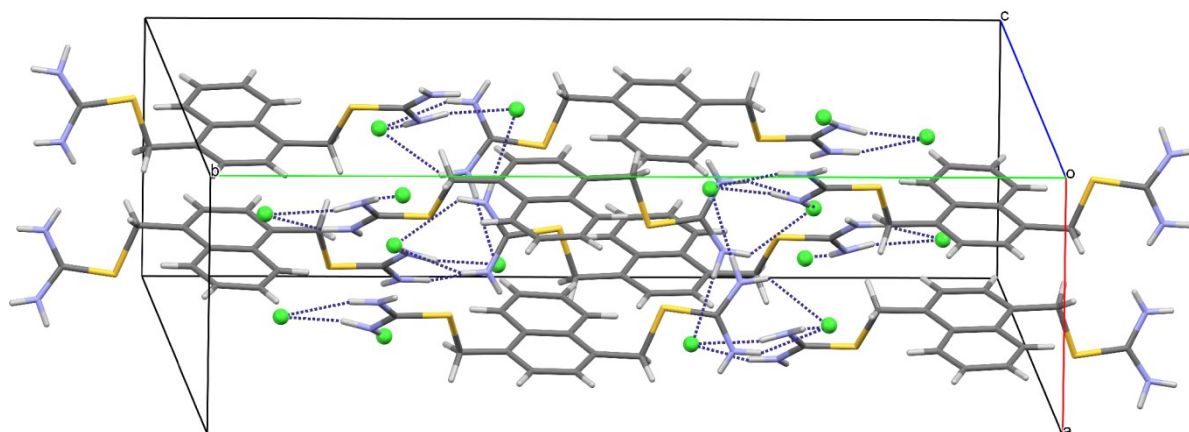

Figure 4S. Crystal packing of **2\_Cl** approximately along the *c* axis. Chloride anions drawn as balls and isothiuronium cations as sticks. Hydrogen bonds drawn as dashed lines.

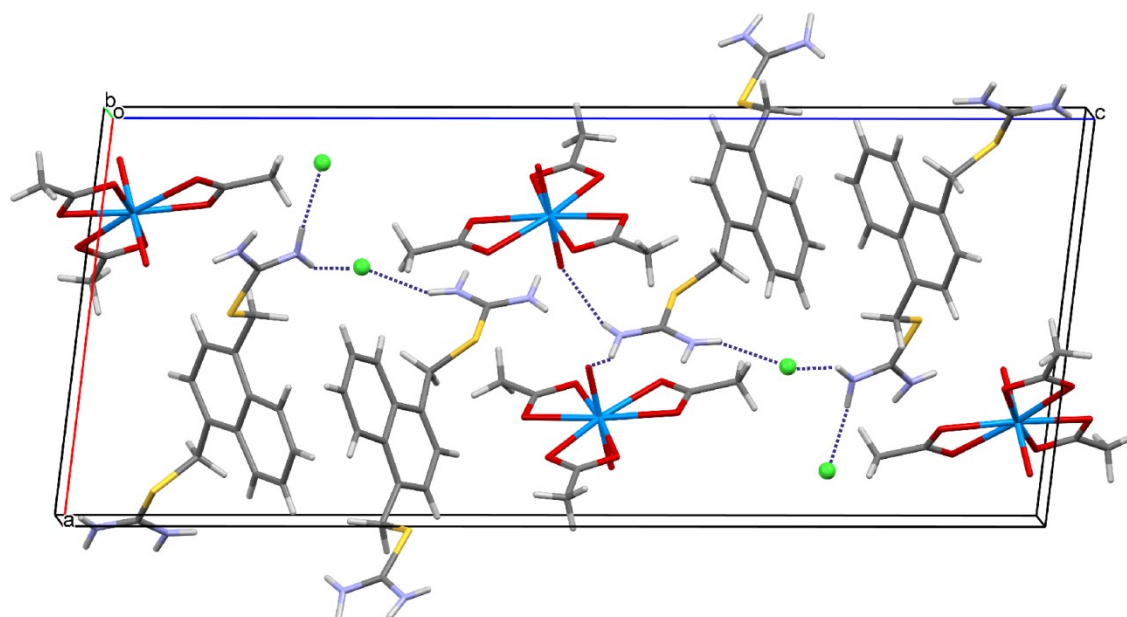

Figure 5S. Crystal packing of **2\_U** approximately along the *b* axis. Chloride anions drawn as balls and the remaining ionic species as sticks. Hydrogen bonds drawn as dashed lines. Not all of H-bonds are visualized.

Table 2S. Calculated HOMO/LUMO energies, bond lengths and bond angles of **1o\_ac**, **1o\_Cl**, **1o\_U**, **2o\_Cl**, and **2o\_U** compounds.

| Compound         | Bond / angle     | Bond length (Å) | Bond angle (°) | E <sub>HOMO</sub> (eV) | E <sub>LUMO</sub> (eV) | ΔE (eV) |
|------------------|------------------|-----------------|----------------|------------------------|------------------------|---------|
| <b>1o_ac</b>     | C(34)-N(3)       | 1.332           | -              | -3.868                 | -3.523                 | 0.345   |
|                  | C(34)-N(4)       | 1.306           | -              |                        |                        |         |
|                  | C(34)-S(1)       | 1.799           | -              |                        |                        |         |
|                  | C(37)-S(1)       | 1.844           | -              |                        |                        |         |
|                  | N(3)-C(34)-N(4)  | -               | 123.5          |                        |                        |         |
|                  | S(1)-C(34)-N(3)  | -               | 121.6          |                        |                        |         |
|                  | S(1)-C(34)-N(4)  | -               | 115.0          |                        |                        |         |
|                  | C(37)-S(1)-C(34) | -               | 102.4          |                        |                        |         |
|                  | N(3)-H(7)⋯O(52)  | 1.495           | 177.5          |                        |                        |         |
|                  | N(4)-H(9)⋯O(51)  | 1.711           | 175.7          |                        |                        |         |
| N(4)-H(10)⋯O(50) | 1.445            | 173.7           |                |                        |                        |         |
| <b>1o_Cl</b>     | C(29)-N(5)       | 1.327           | -              | -5.535                 | -2.612                 | 2.923   |
|                  | C(29)-N(6)       | 1.323           | -              |                        |                        |         |
|                  | C(29)-S(3)       | 1.764           | -              |                        |                        |         |
|                  | C(33)-S(3)       | 1.850           | -              |                        |                        |         |
|                  | N(5)-C(29)-N(6)  | -               | 118.9          |                        |                        |         |
|                  | S(3)-C(29)-N(5)  | -               | 117.2          |                        |                        |         |
|                  | S(3)-C(29)-N(6)  | -               | 123.9          |                        |                        |         |
|                  | C(33)-S(3)-C(29) | -               | 102.8          |                        |                        |         |

## Electronic supplementary information

|                     |                     |       |       |        |        |       |
|---------------------|---------------------|-------|-------|--------|--------|-------|
|                     | N(5)-H(9)···Cl(2)   | 2.019 | 151.6 |        |        |       |
|                     | N(6)-H(11)···Cl(2)  | 1.967 | 154.0 |        |        |       |
| <b>1o_U</b>         | C(14)-N(81)         | 1.327 | -     | -6.268 | -3.66  | 2.608 |
|                     | C(14)-N(82)         | 1.325 | -     |        |        |       |
|                     | C(14)-S(84)         | 1.773 | -     |        |        |       |
|                     | C(16)-S(84)         | 1.857 | -     |        |        |       |
|                     | U(85)=O(29)         | 1.805 | -     |        |        |       |
|                     | U(85)=O(30)         | 1.805 | -     |        |        |       |
|                     | U(85)-O(25)         | 2.569 | -     |        |        |       |
|                     | U(85)-O(26)         | 2.512 | -     |        |        |       |
|                     | U(85)-O(27)         | 2.445 | -     |        |        |       |
|                     | U(85)-O(28)         | 2.453 | -     |        |        |       |
|                     | U(85)-O(31)         | 2.570 | -     |        |        |       |
|                     | U(85)-O(32)         | 2.518 | -     |        |        |       |
|                     | N(81)-C(14)-N(82)   | -     | 121.5 |        |        |       |
|                     | S(84)-C(14)-N(81)   | -     | 116.1 |        |        |       |
|                     | S(84)-C(14)-N(82)   | -     | 122.3 |        |        |       |
|                     | C(14)-S(84)-C(16)   | -     | 102.7 |        |        |       |
|                     | O(29)=U(85)=O(30)   | -     | 178.0 |        |        |       |
| N(81)-H(62)···O(25) | 1.615               | 179.3 |       |        |        |       |
| N(82)-H(64)···O(31) | 1.590               | 178.7 |       |        |        |       |
| <b>2o_Cl</b>        | C(23)-N(35)         | 1.323 | -     | -5.561 | -3.218 | 2.343 |
|                     | C(23)-N(36)         | 1.327 | -     |        |        |       |
|                     | C(23)-S(40)         | 1.763 | -     |        |        |       |
|                     | C(29)-S(40)         | 1.848 | -     |        |        |       |
|                     | N(35)-C(23)-N(36)   | -     | 118.6 |        |        |       |
|                     | S(40)-C(23)-N(35)   | -     | 124.1 |        |        |       |
|                     | S(40)-C(23)-N(36)   | -     | 117.3 |        |        |       |
|                     | C(23)-S(40)-C(29)   | -     | 102.6 |        |        |       |
|                     | N(36)-H(1)···Cl(19) | 2.014 | 152.2 |        |        |       |
|                     | N(35)-H(4)···Cl(19) | 1.966 | 154.5 |        |        |       |
|                     | C(28)-N(37)         | 1.326 | -     |        |        |       |
|                     | C(28)-N(38)         | 1.324 | -     |        |        |       |
|                     | C(28)-S(39)         | 1.762 | -     |        |        |       |
|                     | C(30)-S(39)         | 1.848 | -     |        |        |       |
|                     | N(37)-C(28)-N(38)   | -     | 118.7 |        |        |       |
|                     | S(39)-C(28)-N(37)   | -     | 117.2 |        |        |       |
|                     | S(39)-C(28)-N(38)   | -     | 124.0 |        |        |       |
| C(28)-S(39)-C(30)   | -                   | 102.9 |       |        |        |       |
| N(37)-H(2)···Cl(20) | 2.010               | 152.3 |       |        |        |       |
| N(38)-H(6)···Cl(20) | 1.969               | 154.3 |       |        |        |       |
| <b>2o_U</b>         | C(29)-N(61)         | 1.323 | -     | -5.556 | -3.629 | 1.927 |
|                     | C(29)-N(62)         | 1.326 | -     |        |        |       |
|                     | C(29)-S(58)         | 1.763 | -     |        |        |       |
|                     | C(28)-S(58)         | 1.849 | -     |        |        |       |

|                      |       |       |  |  |  |
|----------------------|-------|-------|--|--|--|
| N(62)-C(29)-N(61)    | -     | 118.7 |  |  |  |
| S(58)-C(29)-N(61)    | -     | 124.2 |  |  |  |
| S(58)-C(29)-N(62)    | -     | 117.1 |  |  |  |
| C(28)-S(58)-C(29)    | -     | 102.9 |  |  |  |
| N(61)-H(53)···Cl(63) | 1.968 | 154.2 |  |  |  |
| N(62)-H(55)···Cl(63) | 2.008 | 152.2 |  |  |  |
| C(27)-N(59)          | 1.323 | -     |  |  |  |
| C(27)-N(60)          | 1.325 | -     |  |  |  |
| C(27)-S(57)          | 1.765 | -     |  |  |  |
| C(19)-S(57)          | 1.850 | -     |  |  |  |
| U(1)=O(4)            | 1.801 | -     |  |  |  |
| U(1)=O(5)            | 1.801 | -     |  |  |  |
| U(1)-O(6)            | 2.577 | -     |  |  |  |
| U(1)-O(2)            | 2.516 | -     |  |  |  |
| U(1)-O(7)            | 2.452 | -     |  |  |  |
| U(1)-O(3)            | 2.453 | -     |  |  |  |
| U(1)-O(8)            | 2.515 | -     |  |  |  |
| U(1)-O(9)            | 2.569 | -     |  |  |  |
| N(59)-C(27)-N(60)    | -     | 121.5 |  |  |  |
| S(57)-C(27)-N(59)    | -     | 122.8 |  |  |  |
| S(57)-C(27)-N(60)    | -     | 115.7 |  |  |  |
| C(19)-S(57)-C(27)    | -     | 103.3 |  |  |  |
| O(4)=U(1)=O(5)       | -     | 178.0 |  |  |  |
| N(59)-H(47)···O(6)   | 1.600 | 178.7 |  |  |  |
| N(60)-H(49)···O(9)   | 1.610 | 178.7 |  |  |  |

Isothiuronium salts create a strong charge-assisted network of hydrogen bonds and ionic interactions. Calculated and experimental data agree well for 1\_ac and 1o\_ac, 1\_Cl and 1o\_Cl, and 1\_U and 1o\_U compounds (Tables 1, 1S, and 2S; Figs. 1, 3, 5 and 9). We can notice similar bond lengths C-N (range from 1.30 to 1.33 Å), C-S (range from 1.75 to 1.85) and bond angles N-C-N (range from 118 to 123°), S-C-N (range from 115 to 123°), and C-S-C (range from 101 to 103°). All ligand 1 compounds feature a *trans* configuration. Similarly to ligand 1 compounds, experimental and calculated bond lengths and bond angles of ligand 2 compounds correlates well; 2\_Cl and 2o\_Cl, and 2\_U and 2o\_U bond lengths C-N (range from 1.29 to 1.32 Å), C-S (range from 1.73 to 1.84) and bond angles N-C-N (range from 118 to 121°), S-C-N (range from 115 to 124°), C-S-C (range from 100 to 103°) (Tables 1, 1S, and 2S; Figs. 7, 8 and 10). All ligand 2 compounds feature a *cis* configuration. The biggest differences between experimental and calculated data we can observe for hydrogen bonds, due to very strong intermolecular interactions in crystals in comparison to single molecules (Tables 1S and 2S).

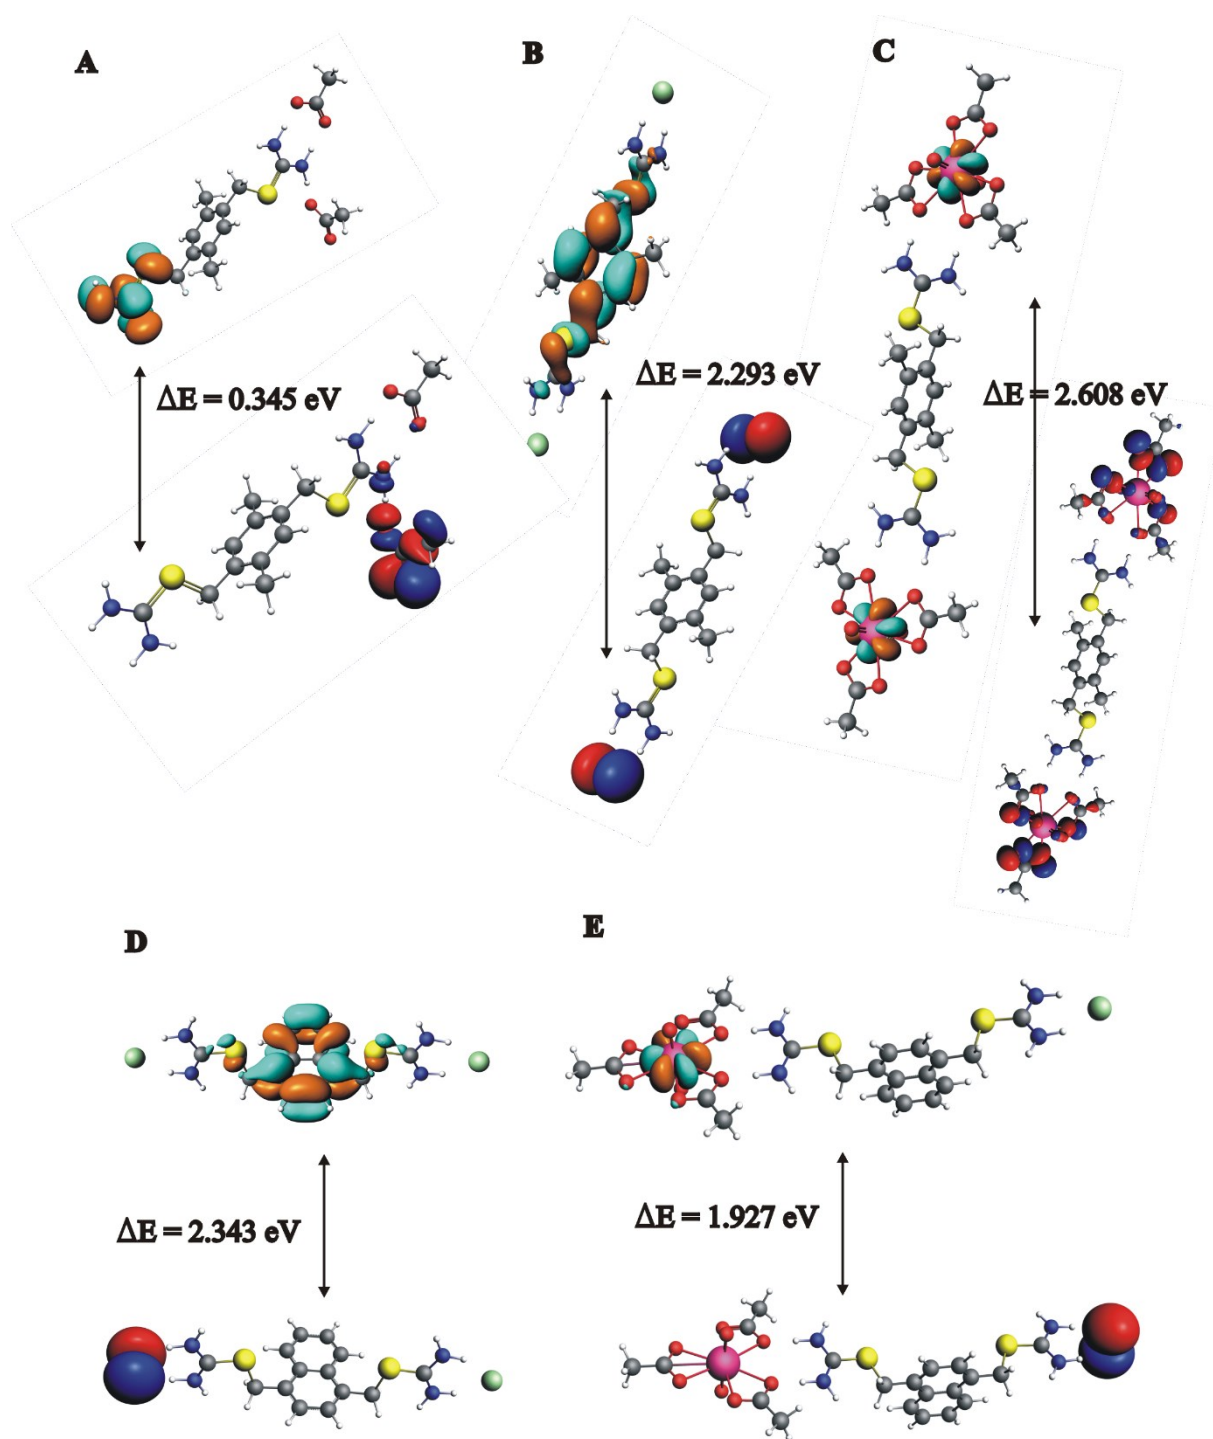

Figure 6S. Calculated frontier molecular orbitals of a)  $1o_{ac}$ , b)  $1o_{Cl}$ , c)  $1o_U$ , d)  $2o_{Cl}$ , and e)  $2o_U$ .

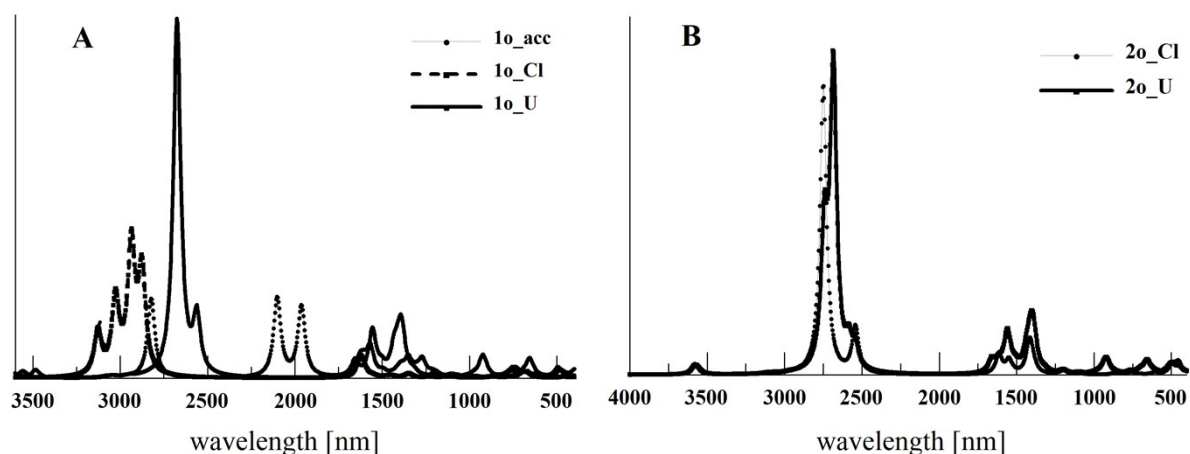

Figure 7S. Calculated IR spectra of a) 1o\_ac, 1o\_Cl and 1o\_U, B) 2o\_Cl and 2o\_U.

Tab. 3S. Observed and calculated FTIR wavenumbers of 1\_ac and 1o\_ac.

| Observed wavenumber [cm <sup>-1</sup> ] |    | Calculated wavenumber [cm <sup>-1</sup> ] | Assignment                                                                                  |
|-----------------------------------------|----|-------------------------------------------|---------------------------------------------------------------------------------------------|
| 596                                     | m  | 549                                       | ring deformation, C-H bending, N-H bending                                                  |
|                                         |    | 583                                       | C-H bending, -COO deformation vibration                                                     |
|                                         |    | 585                                       | ring deformation, C-H bending, N-H bending                                                  |
|                                         |    | 594                                       | C-H bending, -COO deformation vibration, N-H bending                                        |
|                                         |    | 622                                       | C-H bending, N-H bending, N-C-N bending out-of-plane                                        |
| 683                                     | w  | 627                                       | N-H rocking, N-C-N bending in-plane, CS stretching, C-H bending, -COO deformation vibration |
|                                         |    | 632                                       | N-H rocking, C-H bending, -COO deformation vibration                                        |
|                                         |    | 660                                       | ring deformation, C-H bending, N-H rocking, CS stretching                                   |
|                                         |    | 677                                       | ring deformation, C-H bending, N-H rocking, N-C-N bending in-plane, CS stretching           |
| 700                                     | vs | 687                                       | ring deformation, C-H bending, N-H rocking                                                  |
|                                         |    | 690                                       | N-H rocking, N-C-N bending in-plane, CS stretching, C-H bending, -COO deformation vibration |
|                                         |    | 723                                       | ring deformation, C-H bending, N-H rocking, CS stretching                                   |
|                                         |    | 735                                       | ring deformation, C-H bending, CS stretching                                                |
| 773                                     | w  | 762                                       | ring deformation, C-H bending                                                               |
| 795                                     | vw | 802                                       | ring deformation, C-H bending                                                               |
| 890                                     | m  | 875                                       | C-H bending, -COO deformation vibration, N-H bending                                        |
|                                         |    | 878                                       | ring deformation, C-H bending, -COO deformation vibration                                   |
|                                         |    | 891                                       | C-H bending, N-H bending                                                                    |
|                                         |    | 892                                       | ring deformation, C-H bending, N-H bending, -COO deformation vibration                      |
| 994                                     | w  | 953                                       | N-H bending, C-H rocking                                                                    |
|                                         |    | 972                                       | N-H bending, C-H rocking                                                                    |
|                                         |    | 978                                       | C-H bending                                                                                 |
|                                         |    | 980                                       | C-H bending                                                                                 |
| 1009                                    | w  | 1003                                      | C-H bending                                                                                 |
|                                         |    | 1014                                      | C-H rocking, N-H bending,                                                                   |
| 1042                                    | w  | 1023                                      | ring deformation, C-H bending                                                               |



## Electronic supplementary information

|      |    |      |                                                                                                                  |
|------|----|------|------------------------------------------------------------------------------------------------------------------|
|      |    | 1057 | ring deformation, C-H bending, N-H rocking, CN stretching                                                        |
| 1079 | w  | 1067 | N-H bending                                                                                                      |
|      |    | 1089 | N-H bending, C-H bending                                                                                         |
| 1109 | w  | 1104 | N-H rocking                                                                                                      |
|      |    | 1115 | C-H rocking                                                                                                      |
| 1194 | w  | 1175 | C-H bending, ring deformation,                                                                                   |
|      |    | 1187 | C-H bending, ring deformation,                                                                                   |
|      |    | 1190 | N-H rocking, C-H bending                                                                                         |
|      |    | 1198 | N-H rocking, C-H bending, ring deformation                                                                       |
|      |    | 1200 | N-H twisting, C-H bending                                                                                        |
| 1242 | s  | 1216 | C-H bending, N-H rocking, CN stretching, CS stretching                                                           |
| 1264 | m  | 1258 | ring deformation, C-H bending                                                                                    |
|      |    | 1267 | ring deformation, C-H bending                                                                                    |
|      |    | 1271 | C-H bending, N-H rocking, CN stretching, CS stretching, CO stretching                                            |
|      |    | 1299 | C-H bending, CO stretching                                                                                       |
|      |    | 1307 | C-H bending, N-H bending, CO stretching                                                                          |
| 1386 | m  | 1334 | ring deformation, C-H bending                                                                                    |
|      |    | 1350 | C-H bending, N-H rocking, CO stretching                                                                          |
|      |    | 1360 | C-H bending                                                                                                      |
|      |    | 1384 | ring deformation, C-H bending                                                                                    |
|      |    | 1391 | N-H rocking, CS stretching, C-H bending                                                                          |
|      |    | 1396 | N-H rocking, CS stretching, C-H bending                                                                          |
| 1415 | m  | 1408 | N-H rocking, CS stretching, C-H bending                                                                          |
|      |    | 1414 | C-H bending,                                                                                                     |
|      |    | 1423 | C-H bending                                                                                                      |
|      |    | 1425 | N-H rocking, CS stretching, C-H bending, -COO symmetric stretching                                               |
|      |    | 1427 | C-H bending                                                                                                      |
|      |    | 1432 | C-H bending                                                                                                      |
|      |    | 1435 | C-H bending                                                                                                      |
| 1440 | vw | 1443 | ring stretching, C-H bending                                                                                     |
| 1455 | vw | 1453 | ring stretching, C-H bending                                                                                     |
| 1508 | w  | 1489 | ring stretching, C-H bending                                                                                     |
|      |    | 1496 | N-H rocking, C-H bending, -COO asymmetric stretching, N-C-N asymmetric stretching vibrations                     |
|      |    | 1518 | N-H bending, N-C-N asymmetric stretching vibrations                                                              |
| 1532 | w  | 1551 | ring stretching, C-H rocking, C-H scissoring                                                                     |
|      |    | 1568 | N-H scissoring, C-H bending, -COO asymmetric stretching, N-C-N asymmetric stretching vibrations                  |
| 1630 | s  | 1603 | N-H scissoring, N-C-N asymmetric stretching vibrations, ring stretching, C-H bending, -COO asymmetric stretching |
|      |    | 1606 | N-H scissoring, N-C-N asymmetric stretching vibrations, ring stretching                                          |
|      |    | 1622 | N-H scissoring, N-C-N symmetric stretching vibrations                                                            |
|      |    | 1626 | N-H scissoring, N-C-N asymmetric stretching vibrations                                                           |
| 1644 | s  | 1632 | N-H scissoring, N-C-N asymmetric stretching vibrations                                                           |
| 1707 | m  | 1671 | N-H scissoring, N-C-N asymmetric stretching vibrations                                                           |
| 2698 | w  | 1962 | N-H stretching vibrations (bounded by hydrogen bond)                                                             |
|      |    | 2101 | N-H stretching vibrations (bounded by hydrogen bond)                                                             |
| 2723 | w  | 2823 | N-H stretching vibrations (bounded by hydrogen bond)                                                             |
| 2990 | m  | 2941 | C-H symmetric stretching vibrations                                                                              |
|      |    | 2943 | C-H symmetric stretching vibrations                                                                              |
|      |    | 2945 | C-H symmetric stretching vibrations                                                                              |
|      |    | 2953 | C-H symmetric stretching vibrations                                                                              |
|      |    | 2964 | C-H symmetric stretching vibrations                                                                              |
|      |    | 2977 | C-H symmetric stretching vibrations                                                                              |

## Electronic supplementary information

|      |   |      |                                      |
|------|---|------|--------------------------------------|
|      |   | 3007 | C-H asymmetric stretching vibrations |
|      |   | 3014 | C-H asymmetric stretching vibrations |
|      |   | 3029 | C-H asymmetric stretching vibrations |
|      |   | 3031 | C-H asymmetric stretching vibrations |
|      |   | 3035 | C-H asymmetric stretching vibrations |
|      |   | 3049 | C-H asymmetric stretching vibrations |
|      |   | 3056 | C-H asymmetric stretching vibrations |
|      |   | 3060 | C-H asymmetric stretching vibrations |
|      |   | 3066 | C-H asymmetric stretching vibrations |
|      |   | 3077 | C-H asymmetric stretching vibrations |
|      |   | 3085 | C-H asymmetric stretching vibrations |
| 3181 | m | 3480 | N-H asymmetric stretching vibrations |
|      |   | 3490 | N-H asymmetric stretching vibrations |
| 3232 | m | 3579 | N-H asymmetric stretching vibrations |
|      |   | 3607 | N-H asymmetric stretching vibrations |
|      |   | 3613 | N-H asymmetric stretching vibrations |

Tab. 4S. Observed and calculated FTIR wavenumbers of 1\_Cl and 1o\_Cl.

| Observed wavenumber [cm <sup>-1</sup> ] |    | Calculated wavenumber [cm <sup>-1</sup> ] | Assignment                                                                    |
|-----------------------------------------|----|-------------------------------------------|-------------------------------------------------------------------------------|
| 590                                     | m  | 580                                       | ring deformation, C-H bending, N-H rocking, N-C-N bending out-of-plane        |
|                                         |    | 603                                       | ring deformation, C-H bending, N-H rocking, N-C-N bending out-of-plane        |
| 699                                     | s  | 672                                       | CS stretching, N-C-N bending in-plane, N-H rocking                            |
|                                         |    | 683                                       | ring deformation, C-H bending, N-H bending                                    |
| 758                                     | vw | 727                                       | N-H rocking, CS stretching, C-H rocking, C-H scissoring, C-C ring deformation |
|                                         |    | 746                                       | N-H rocking, CS stretching, C-H rocking, C-H scissoring, C-C ring deformation |
|                                         |    | 759                                       | N-H bending, C-H rocking, C-H scissoring                                      |
|                                         |    | 775                                       | N-H bending                                                                   |
|                                         |    | 799                                       | N-H bending, C-H rocking, C-H scissoring                                      |
| 853                                     | vw | 836                                       | N-H bending                                                                   |
|                                         |    | 875                                       | C-H rocking, ring deformation                                                 |
| 890                                     | vw | 901                                       | C-H rocking, ring deformation                                                 |
| 991                                     | vw | 977                                       | C-H bending, ring deformation                                                 |
| 1038                                    | vw | 1018                                      | C-H bending, ring deformation                                                 |
| 1079                                    | vw | 1060                                      | ring deformation                                                              |
| 1109                                    | vw | 1103                                      | ring deformation, C-H rocking, N-H rocking                                    |
|                                         |    | 1112                                      | C-H rocking, N-H rocking                                                      |
| 1150                                    | vw | 1131                                      | N-H rocking,                                                                  |
| 1196                                    | vw | 1175                                      | ring deformation, C-H bending                                                 |
|                                         |    | 1195                                      | ring deformation, C-H bending                                                 |
| 1242                                    | m  | 1229                                      | C-H rocking, ring deformation, N-H rocking                                    |
| 1299                                    | w  | 1326                                      | ring stretching                                                               |
|                                         |    | 1347                                      | C-H bending, N-H rocking, CS stretching                                       |
|                                         |    | 1356                                      | C-H bending, N-H rocking, CS stretching                                       |

## Electronic supplementary information

|              |    |      |                                                                                                    |
|--------------|----|------|----------------------------------------------------------------------------------------------------|
| 1389         | w  | 1378 | C-H rocking, ring stretching                                                                       |
| 1422         | s  | 1422 | C-H scissoring, ring stretching                                                                    |
| 1457         | w  | 1446 | C-H scissoring, ring stretching                                                                    |
| 1496         | w  | 1451 | C-H scissoring, ring stretching                                                                    |
| 1534         | vw | 1483 | C-H bending, ring stretching                                                                       |
| 1623         | w  | 1555 | N-H scissoring vibrations, N-C-N asymmetric stretching vibrations                                  |
| 1647         | s  | 1607 | N-H scissoring vibrations, N-C-N symmetric stretching vibrations                                   |
|              |    | 1624 | N-H scissoring vibrations, N-C-N asymmetric stretching vibrations                                  |
| 2700<br>2716 | m  | 2875 | N-H out-of-phase stretching vibrations (bounded by hydrogen bond) characteristic doublet           |
| 2994         | vs | 2924 | C-H symmetric stretching vibrations                                                                |
|              |    | 2929 | C-H symmetric stretching vibrations, N-H in-phase stretching vibrations (bounded by hydrogen bond) |
|              |    | 2936 | C-H symmetric stretching vibrations, N-H in-phase stretching vibrations (bounded by hydrogen bond) |
|              |    | 2991 | C-H asymmetric stretching vibrations                                                               |
|              |    | 3012 | C-H asymmetric stretching vibrations                                                               |
| 3175         | s  | 3026 | N-H asymmetric stretching vibrations, C-H asymmetric stretching vibrations                         |
|              |    | 3032 | N-H asymmetric stretching vibrations, C-H asymmetric stretching vibrations                         |
|              |    | 3069 | C-H asymmetric stretching vibrations                                                               |
| 3237         | s  | 3127 | N-H asymmetric stretching vibrations                                                               |

Tab. 5S. Observed and calculated FTIR wavenumbers of 1\_U and 1o\_U.

| Observed wavenumber [cm <sup>-1</sup> ] |    | Calculated wavenumber [cm <sup>-1</sup> ] | Assignment                                                           |
|-----------------------------------------|----|-------------------------------------------|----------------------------------------------------------------------|
| 604                                     | m  | 581                                       | ring deformation, C-H bending, N-H bending                           |
|                                         |    | 586                                       | C-H bending, -COO deformation vibration                              |
|                                         |    | 589                                       | C-H bending, -COO deformation vibration                              |
|                                         |    | 593                                       | C-H bending, -COO deformation vibration                              |
| 674                                     | vs | 631                                       | N-H rocking, N-C-N bending out-of-plane                              |
|                                         |    | 654                                       | N-H rocking, C-H bending, -COO deformation vibration                 |
|                                         |    | 658                                       | N-H rocking, C-H bending, -COO deformation vibration                 |
|                                         |    | 671                                       | N-H rocking, C-H bending, -COO deformation vibration, C-S stretching |
|                                         |    | 679                                       | N-H rocking, C-H bending, ring deformation                           |
|                                         |    | 697                                       | N-H rocking, N-C-N bending in-plane, CS stretching                   |
| 714                                     | vw | 727                                       | N-H rocking, C-H bending, ring deformation                           |
|                                         |    | 802                                       | C-H bending, C-C ring deformation                                    |
| 896                                     | vw | 872                                       | N-H bending, C-H rocking, C-H scissoring, ring deformation           |
|                                         |    | 887                                       | N-H bending, C-H rocking, C-H scissoring                             |
|                                         |    | 896                                       | N-H bending, C-H rocking, C-H scissoring                             |
|                                         |    | 908                                       | C-H bending, -COO deformation vibration, N-H bending                 |
|                                         |    | 916                                       | C-H bending, -COO deformation vibration, N-H bending                 |
| 918                                     | vs | 922                                       | U=O asymmetric stretching vibrations, N-H bending                    |
|                                         |    | 926                                       | C-H bending, -COO deformation vibration, N-H bending                 |
| 937                                     | vw | 935                                       | N-H rocking,                                                         |
| 950                                     | vw | 978                                       | C-H bending, ring deformation                                        |

## Electronic supplementary information

|      |    |      |                                                                                              |
|------|----|------|----------------------------------------------------------------------------------------------|
|      |    | 979  | C-H bending                                                                                  |
|      |    | 980  | C-H bending                                                                                  |
| 1008 | w  | 1020 | C-H bending, ring deformation                                                                |
|      |    | 1022 | C-H bending                                                                                  |
|      |    | 1023 | C-H bending                                                                                  |
|      |    | 1024 | C-H bending                                                                                  |
| 1044 | w  | 1095 | N-H rocking, CN stretching, C-H bending, ring deformation                                    |
| 1078 | vw | 1103 | CN stretching, N-H bending, C-H bending                                                      |
|      |    | 1178 | C-H rocking, C-H scissoring, ring deformation                                                |
|      |    | 1192 | C-H rocking, C-H scissoring, ring deformation                                                |
| 1241 | vw | 1204 | C-H rocking, C-H scissoring, N-H rocking,                                                    |
| 1251 | vw | 1258 | C-H rocking, C-H scissoring, N-H rocking,                                                    |
| 1345 | vw | 1317 | C-H rocking, C-H scissoring                                                                  |
|      |    | 1318 | C-H rocking, C-H scissoring                                                                  |
|      |    | 1319 | C-H rocking, C-H scissoring                                                                  |
|      |    | 1331 | C-H rocking, C-H scissoring, ring deformation                                                |
|      |    | 1361 | C-H rocking, C-H scissoring, ring deformation                                                |
| 1403 | s  | 1384 | C-H bending, ring deformation, N-H rocking,                                                  |
|      |    | 1386 | C-H bending, N-H rocking, -CO stretching                                                     |
|      |    | 1389 | C-H bending, N-H rocking, -CO stretching                                                     |
|      |    | 1396 | C-H bending, N-H rocking, -CO stretching                                                     |
|      |    | 1400 | C-H bending, N-H rocking, -CO stretching                                                     |
|      |    | 1408 | C-H bending, N-H rocking                                                                     |
|      |    | 1410 | C-H bending, N-H rocking                                                                     |
|      |    | 1420 | C-H bending                                                                                  |
| 1454 | s  | 1429 | C-H bending, -COO symmetric stretching                                                       |
|      |    | 1431 | C-H bending, -COO symmetric stretching                                                       |
|      |    | 1432 | C-H bending, C-C ring deformation, N-H rocking, -COO symmetric stretching                    |
|      |    | 1434 | C-H bending                                                                                  |
|      |    | 1454 | C-H bending                                                                                  |
|      |    | 1489 | C-H bending, ring stretching                                                                 |
| 1509 | w  | 1504 | C-H bending, -COO asymmetric stretching, N-H bending, N-C-N asymmetric stretching vibrations |
| 1530 | m  | 1542 | C-H bending, -COO asymmetric stretching, N-H bending, N-C-N asymmetric stretching vibrations |
|      |    | 1557 | C-H bending, -COO asymmetric stretching, N-H bending, N-C-N asymmetric stretching vibrations |
| 1631 | w  | 1655 | N-H scissoring, N-C-N asymmetric stretching vibrations                                       |
| 1647 | m  | 1658 | N-H scissoring, N-C-N asymmetric stretching vibrations                                       |
| 1668 | w  |      |                                                                                              |
| 2700 | vw | 2562 | N-H out-of-phase stretching vibrations (bounded by hydrogen bond)                            |
| 2729 | vw |      |                                                                                              |
| 2787 | vw |      |                                                                                              |
| 3002 | m  | 2939 | C-H symmetric stretching vibrations                                                          |
|      |    | 2956 | C-H symmetric stretching vibrations                                                          |
|      |    | 2957 | C-H symmetric stretching vibrations                                                          |
|      |    | 2968 | C-H symmetric stretching vibrations                                                          |
|      |    | 3010 | C-H asymmetric stretching vibrations                                                         |
|      |    | 3040 | C-H asymmetric stretching vibrations                                                         |
|      |    | 3046 | C-H asymmetric stretching vibrations                                                         |

## Electronic supplementary information

|      |                                      |      |                                      |
|------|--------------------------------------|------|--------------------------------------|
|      |                                      | 3054 | C-H asymmetric stretching vibrations |
| 3059 | m                                    | 3080 | C-H asymmetric stretching vibrations |
|      |                                      | 3081 | C-H asymmetric stretching vibrations |
|      |                                      | 3084 | C-H asymmetric stretching vibrations |
|      |                                      | 3240 | m                                    |
| 3567 | N-H asymmetric stretching vibrations |      |                                      |

Tab. 6S. Observed and calculated FTIR wavenumbers of 2o\_Cl and 2o\_Cl.

| Observed wavenumber [cm <sup>-1</sup> ] |    | Calculated wavenumber [cm <sup>-1</sup> ] | Assignment                                                                        |
|-----------------------------------------|----|-------------------------------------------|-----------------------------------------------------------------------------------|
| 502                                     | m  | 500                                       | ring deformation, N-H bending, CS stretching                                      |
| 542                                     | w  | 541                                       | ring deformation                                                                  |
| 570                                     | w  | 587                                       | ring deformation, N-H bending, CS stretching                                      |
| 595                                     | vw | 610                                       | N-H rocking, N-C-N bending out-of-plane                                           |
|                                         |    | 611                                       | N-H rocking, N-C-N bending out-of-plane                                           |
| 622                                     | w  | 625                                       | ring deformation, N-H bending, CS stretching                                      |
| 706                                     | vw | 691                                       | ring deformation, C-H bending                                                     |
|                                         |    | 699                                       | ring deformation, C-H bending, N-H rocking                                        |
|                                         |    | 707                                       | CS stretching, N-C-N bending in-plane, N-H rocking, C-H bending, ring deformation |
|                                         |    | 712                                       | CS stretching, N-C-N bending in-plane, N-H rocking, C-H bending, ring deformation |
| 766                                     | s  | 755                                       | C-H bending, ring deformation, N-H rocking                                        |
|                                         |    | 761                                       | C-H bending                                                                       |
|                                         |    | 772                                       | N-H bending                                                                       |
|                                         |    | 774                                       | N-H bending                                                                       |
| 786                                     | w  | 790                                       | C-H bending, ring deformation, N-H bending                                        |
| 845                                     | vw | 834                                       | C-H bending out-of-plane                                                          |
|                                         |    | 869                                       | N-H rocking, N-C-N bending out-of-plane                                           |
|                                         |    | 870                                       | N-H rocking, N-C-N bending out-of-plane                                           |
|                                         |    | 875                                       | C-H rocking, C-H scissoring                                                       |
| 948                                     | vw | 938                                       | C-H bending                                                                       |
|                                         |    | 941                                       | C-H bending                                                                       |
| 969                                     | vw | 975                                       | C-H bending                                                                       |
| 994                                     | vw | 998                                       | ring deformation, C-H rocking, C-H scissoring                                     |
|                                         |    | 1036                                      | ring deformation, C-H rocking, C-H scissoring                                     |
| 1077                                    | m  | 1089                                      | N-H rocking                                                                       |
|                                         |    | 1091                                      | N-H rocking                                                                       |
| 1111                                    | w  | 1102                                      | N-H rocking                                                                       |
|                                         |    | 1114                                      | C-H bending,                                                                      |
|                                         |    | 1116                                      | C-H bending,                                                                      |
| 1141                                    | w  | 1149                                      | C-H bending,                                                                      |
| 1164                                    | w  | 1156                                      | C-H bending,                                                                      |

## Electronic supplementary information

|      |                                    |      |                                                                        |
|------|------------------------------------|------|------------------------------------------------------------------------|
| 1219 | w                                  | 1196 | C-H bending, N-H rocking                                               |
|      |                                    | 1202 | C-H bending, N-H rocking                                               |
|      |                                    | 1227 | C-H bending,                                                           |
| 1247 | m                                  | 1235 | ring deformation, C-H rocking, C-H scissoring                          |
|      |                                    | 1261 | ring deformation, C-H rocking, C-H scissoring                          |
| 1338 | w                                  | 1348 | ring deformation, C-H rocking, C-H scissoring                          |
| 1386 | w                                  | 1378 | ring deformation, C-H rocking, C-H scissoring                          |
|      |                                    | 1380 | ring deformation, C-H rocking, C-H scissoring                          |
| 1407 | w                                  | 1402 | N-H rocking, CN stretching, C-H rocking, C-H scissoring                |
|      |                                    | 1403 | N-H rocking, CN stretching                                             |
| 1424 | m                                  | 1417 | CN stretching, CS stretching, N-H rocking, C-H rocking, C-H scissoring |
|      |                                    | 1421 | CS stretching, N-H rocking, C-H rocking, C-H scissoring                |
| 1439 | m                                  | 1436 | ring stretching, C-H scissoring, N-H bending                           |
|      |                                    | 1441 | ring stretching, C-H scissoring, N-H bending                           |
|      |                                    | 1450 | ring stretching,                                                       |
| 1527 | m                                  | 1511 | ring stretching, C-H bending                                           |
|      |                                    | 1549 | N-H scissoring, N-C-N symmetric stretching vibrations                  |
|      |                                    | 1550 | N-H scissoring, N-C-N symmetric stretching vibrations                  |
| 1592 | w                                  | 1575 | ring stretching                                                        |
|      |                                    | 1586 | ring stretching                                                        |
|      |                                    | 1609 | ring stretching                                                        |
| 1630 | s                                  | 1615 | N-H scissoring, N-C-N asymmetric stretching vibrations                 |
| 1649 | w                                  |      |                                                                        |
| 2707 | w                                  | 2540 | N-H out-of-phase stretching vibrations (bounded by hydrogen bond)      |
|      |                                    | 2545 | N-H out-of-phase stretching vibrations (bounded by hydrogen bond)      |
| 2728 | vw                                 | 2749 | N-H in-phase stretching vibrations (bounded by hydrogen bond)          |
|      |                                    | 2755 | N-H in-phase stretching vibrations (bounded by hydrogen bond)          |
| 3032 | vs                                 | 2973 | C-H symmetric stretching vibrations                                    |
|      |                                    | 2974 | C-H symmetric stretching vibrations                                    |
|      |                                    | 3045 | C-H asymmetric stretching vibrations                                   |
|      |                                    | 3046 | C-H asymmetric stretching vibrations                                   |
|      |                                    | 3094 | C-H aromatic stretching vibrations                                     |
|      |                                    | 3101 | C-H aromatic stretching vibrations                                     |
|      |                                    | 3109 | C-H aromatic stretching vibrations                                     |
|      |                                    | 3119 | C-H aromatic stretching vibrations                                     |
| 3127 | C-H aromatic stretching vibrations |      |                                                                        |
| 3212 | s                                  | 3576 | N-H asymmetric stretching vibrations                                   |
|      |                                    | 3591 | N-H asymmetric stretching vibrations                                   |

Tab. 7S. Observed and calculated FTIR wavenumbers of 2<sub>U</sub> and 2o<sub>U</sub>.

| Observed wavenumber [cm <sup>-1</sup> ] | Calculated wavenumber [cm <sup>-1</sup> ] | Assignment |
|-----------------------------------------|-------------------------------------------|------------|
|-----------------------------------------|-------------------------------------------|------------|

## Electronic supplementary information

|      |    |      |                                                                                    |
|------|----|------|------------------------------------------------------------------------------------|
| 591  | m  | 517  | N-H bending                                                                        |
|      |    | 541  | ring deformation, C-H bending, N-H bending                                         |
|      |    | 587  | ring deformation, C-H bending, N-H bending, CS stretching                          |
|      |    | 588  | C-H bending, –COO deformation vibration                                            |
|      |    | 589  | C-H bending, –COO deformation vibration                                            |
|      |    | 590  | C-H bending, –COO deformation vibration                                            |
| 672  | vs | 612  | N-C-N bending out-of-plane                                                         |
|      |    | 625  | ring deformation, C-H bending, N-H bending                                         |
|      |    | 633  | N-H bending, N-C-N bending out-of-plane                                            |
|      |    | 656  | N-H bending, C-H bending, –COO deformation vibration                               |
|      |    | 658  | N-H bending, C-H bending, –COO deformation vibration                               |
|      |    | 671  | N-H bending, C-H bending, –COO deformation vibration                               |
| 695  | w  | 691  | ring deformation, N-H rocking, C-H bending,                                        |
|      |    | 697  | C-H bending, CS stretching, N-H rocking, N-C-N bending in-plane,                   |
|      |    | 703  | C-H bending, CS stretching, N-H rocking, N-C-N bending in-plane,                   |
|      |    | 709  | C-H bending, CS stretching, N-H rocking, N-C-N bending in-plane,                   |
|      |    | 711  | C-H bending, ring deformation, CS stretching, N-H rocking, N-C-N bending in-plane, |
| 769  | m  | 754  | ring deformation, C-H bending                                                      |
|      |    | 760  | ring deformation, C-H bending                                                      |
|      |    | 772  | N-H bending                                                                        |
| 790  | w  | 790  | C-H bending, ring deformation                                                      |
| 837  | w  | 832  | C-H bending, ring deformation                                                      |
| 850  | w  | 851  | C-H bending, ring deformation                                                      |
| 876  | w  | 867  | N-H bending                                                                        |
|      |    | 871  | N-H bending, C-H bending, ring deformation                                         |
|      |    | 886  | N-H bending, C-H bending                                                           |
|      |    | 900  | N-H bending, C-H bending                                                           |
| 912  | vs | 909  | C-H bending, –COO deformation vibration, N-H bending                               |
|      |    | 916  | C-H bending, –COO deformation vibration, N-H bending                               |
|      |    | 919  | U=O asymmetric stretching vibrations, N-H bending                                  |
|      |    | 925  | C-H bending, –COO deformation vibration, N-H bending                               |
| 937  | w  | 936  | N-H bending, C-H bending                                                           |
|      |    | 937  | N-H bending, C-H bending                                                           |
| 950  | vw | 973  | C-H bending, ring deformation                                                      |
|      |    | 978  | C-H twisting                                                                       |
|      |    | 979  | C-H twisting                                                                       |
|      |    | 980  | C-H twisting                                                                       |
| 1013 | w  | 999  | C-H bending, ring deformation                                                      |
| 1021 | vw | 1021 | C-H bending                                                                        |
|      |    | 1023 | C-H bending                                                                        |
|      |    | 1038 | C-H bending, ring deformation                                                      |
| 1044 | w  | 1088 | N-H rocking                                                                        |
|      |    | 1094 | N-H rocking                                                                        |

## Electronic supplementary information

|      |    |      |                                                                                                 |
|------|----|------|-------------------------------------------------------------------------------------------------|
| 1128 | vw | 1101 | N-H rocking, CN stretching                                                                      |
|      |    | 1105 | N-H rocking, CN stretching, CS stretching                                                       |
|      |    | 1115 | C-H rocking, C-H scissoring                                                                     |
|      |    | 1117 | C-H rocking, C-H scissoring                                                                     |
|      |    | 1150 | C-H rocking, C-H scissoring                                                                     |
|      |    | 1161 | C-H rocking, C-H scissoring                                                                     |
|      |    | 1197 | C-H rocking                                                                                     |
|      |    | 1203 | C-H rocking                                                                                     |
| 1223 | vw | 1228 | C-H bending, ring deformation                                                                   |
| 1238 | w  | 1236 | C-H bending, ring deformation                                                                   |
| 1259 | w  | 1262 | C-H bending, ring deformation                                                                   |
|      |    | 1317 | C-H rocking                                                                                     |
|      |    | 1318 | C-H rocking                                                                                     |
|      |    | 1319 | C-H rocking                                                                                     |
| 1351 | w  | 1348 | C-H bending, ring deformation                                                                   |
| 1391 | w  | 1381 | C-H bending, ring deformation                                                                   |
|      |    | 1388 | -CO stretching, C-H bending, N-H rocking                                                        |
|      |    | 1392 | -CO stretching, CS stretching, N-H rocking, C-H bending                                         |
|      |    | 1399 | -CO stretching, CS stretching, CN stretching, N-H bending, C-H bending                          |
|      |    | 1400 | -CO stretching, CN stretching, N-H rocking, C-H bending                                         |
| 1407 | m  | 1407 | -CO stretching, N-H rocking, C-H rocking                                                        |
|      |    | 1408 | -CO stretching, N-H rocking, C-H rocking                                                        |
|      |    | 1410 | -COO symmetric stretching, N-H rocking, C-H bending                                             |
|      |    | 1416 | CS stretching, N-C-N symmetric stretching, N-H bending, C-H bending                             |
|      |    | 1420 | C-H bending, ring stretching, CS stretching, N-C-N symmetric stretching, N-H rocking            |
| 1428 | w  | 1427 | C-H bending                                                                                     |
|      |    | 1428 | C-H bending                                                                                     |
| 1456 | m  | 1434 | C-H rocking, C-H scissoring, N-H rocking                                                        |
|      |    | 1437 | C-H bending, -COO symmetric stretching                                                          |
|      |    | 1440 | C-H bending, N-H bending                                                                        |
| 1525 | s  | 1507 | C-H bending, -COO asymmetric stretching, N-H bending,                                           |
|      |    | 1510 | C-H bending, ring deformation                                                                   |
|      |    | 1547 | C-H bending, -COO asymmetric stretching, N-H scissoring, N-C-N asymmetric stretching vibrations |
|      |    | 1548 | N-H scissoring,                                                                                 |
|      |    | 1561 | C-H bending, -COO asymmetric stretching, N-H scissoring, N-C-N asymmetric stretching vibrations |
|      |    | 1562 | C-H bending, -COO asymmetric stretching, N-H scissoring, N-C-N asymmetric stretching vibrations |
| 1644 | w  | 1574 | ring stretching                                                                                 |
|      |    | 1585 | C-H bending, ring stretching                                                                    |
|      |    | 1614 | N-H scissoring, N-C-N asymmetric stretching vibrations                                          |
| 1658 | m  | 1659 | N-H scissoring, N-C-N asymmetric stretching vibrations                                          |
| 1672 | w  | 1662 | N-H scissoring, N-C-N asymmetric stretching vibrations                                          |



## Electronic supplementary information

|      |    |              |                                                                   |
|------|----|--------------|-------------------------------------------------------------------|
| 2688 | vw | 2541         | N-H out-of-phase stretching vibrations (bounded by hydrogen bond) |
|      |    | 2584         | N-H out-of-phase stretching vibrations (bounded by hydrogen bond) |
| 2737 | vw | 2685<br>2742 | N-H in-phase stretching vibrations (bounded by hydrogen bond)     |
| 2771 | v  |              |                                                                   |
| 3019 | m  | 2960         | C-H symmetric stretching vibrations                               |
|      |    | 2967         | C-H symmetric stretching vibrations                               |
|      |    | 2971         | C-H symmetric stretching vibrations                               |
|      |    | 3043         | C-H symmetric stretching vibrations                               |
|      |    | 3050         | C-H symmetric stretching vibrations                               |
|      |    | 3084         | C-H asymmetric stretching vibrations                              |
|      |    | 3086         | C-H asymmetric stretching vibrations                              |
|      |    | 3087         | C-H asymmetric stretching vibrations                              |
| 3122 | m  | 3095         | C-H aromatic stretching vibrations                                |
|      |    | 3110         | C-H aromatic stretching vibrations                                |
|      |    | 3119         | C-H aromatic stretching vibrations                                |
|      |    | 3126         | C-H aromatic stretching vibrations                                |
| 3365 | m  | 3555         | N-H asymmetric stretching vibrations                              |
|      |    | 3574         | N-H asymmetric stretching vibrations                              |
|      |    | 3590         | N-H asymmetric stretching vibrations                              |

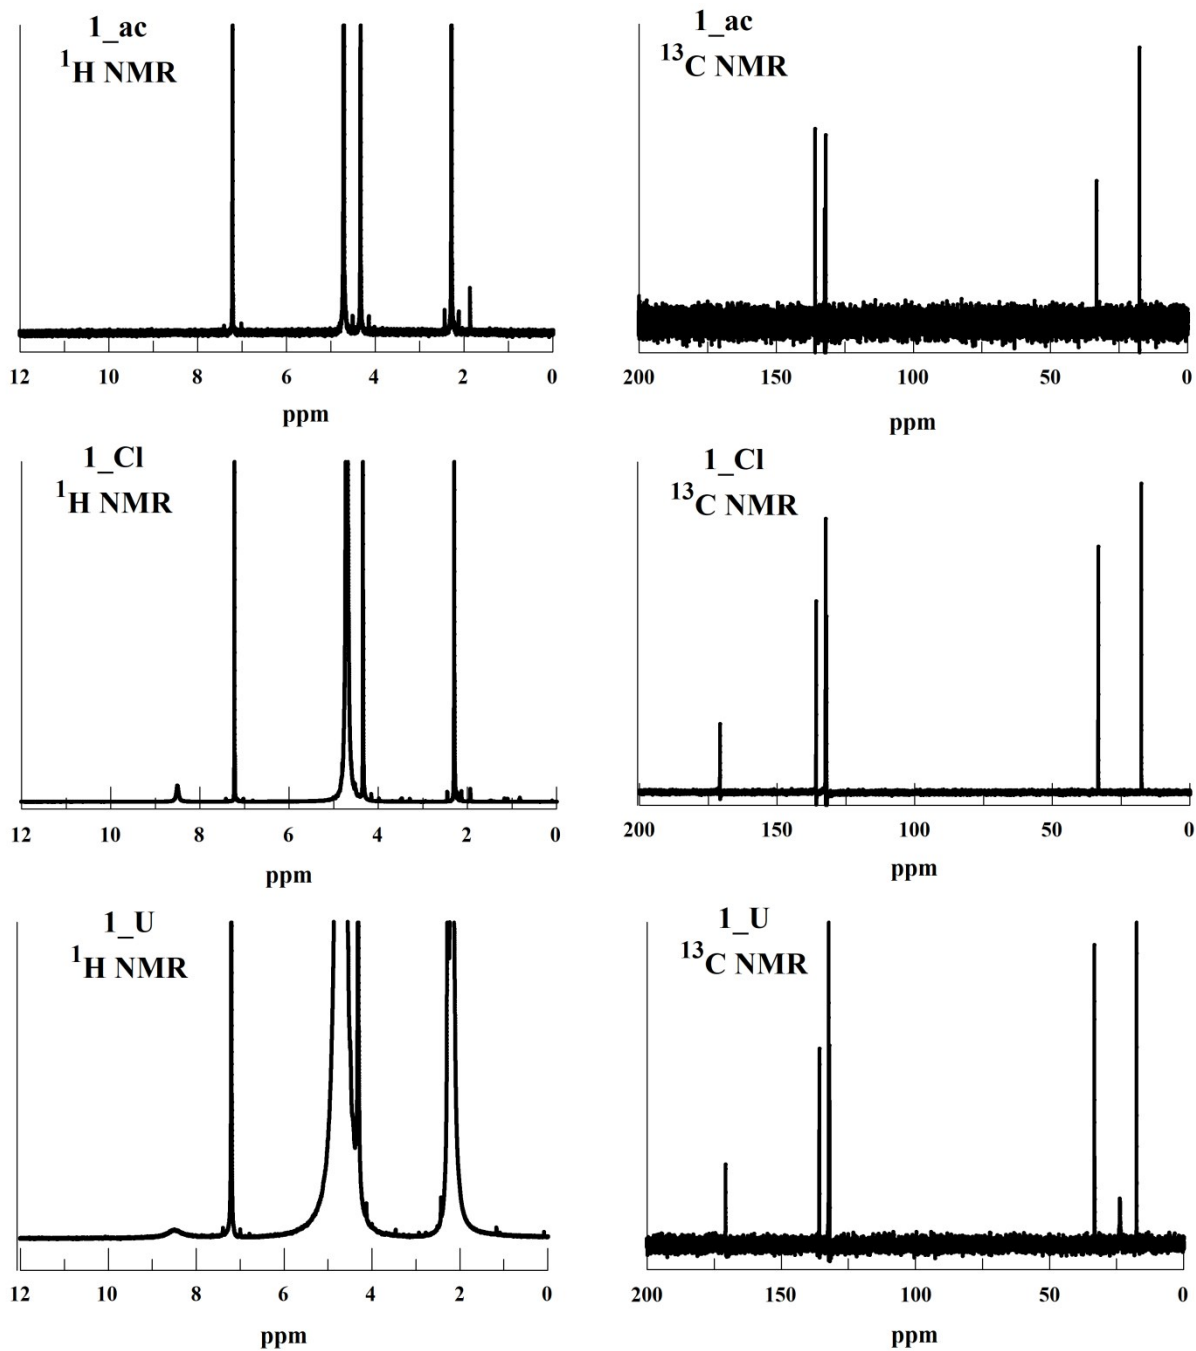

Figure 8S. NMR spectra of 1\_ac, 1\_Cl and 1\_U.

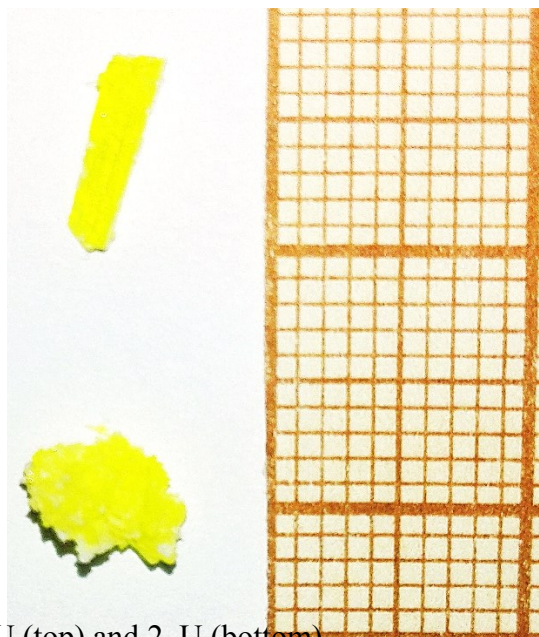

Figure 9S. Crystals of 1\_U (top) and 2\_U (bottom).

**Cartesian coordinates (Å) for the species under study calculated by Amsterdam Density Functional package (ADF2019)**

**1o\_ac**

|      |           |          |           |
|------|-----------|----------|-----------|
| 1.S  | 0.565980  | 7.910178 | 12.654652 |
| 2.N  | -0.927483 | 8.245689 | 10.379402 |
| 3.H  | -1.073209 | 8.445218 | 9.299485  |
| 4.H  | -1.730578 | 8.206084 | 10.991662 |
| 5.N  | 1.385986  | 8.340454 | 10.190660 |
| 6.H  | 1.248798  | 8.549018 | 9.162995  |
| 7.H  | 2.390571  | 8.255045 | 10.675540 |
| 8.C  | -1.049679 | 7.214212 | 14.719735 |
| 9.C  | 0.298093  | 8.193349 | 10.898036 |
| 10.C | -0.734558 | 5.566901 | 16.439473 |
| 11.H | -0.557686 | 4.529875 | 16.735226 |
| 12.C | -0.822132 | 5.868525 | 15.079399 |
| 13.C | -1.147537 | 7.630474 | 13.277255 |
| 14.H | -1.729850 | 8.558056 | 13.192352 |
| 15.H | -1.618758 | 6.842536 | 12.674413 |
| 16.C | -0.680415 | 4.784229 | 14.046436 |
| 17.H | -1.623298 | 4.627847 | 13.499482 |
| 18.H | -0.405566 | 3.830458 | 14.511920 |
| 19.H | 0.088005  | 5.042898 | 13.303791 |
| 20.S | -2.459123 | 5.775874 | 19.475427 |
| 21.N | -1.050424 | 5.320472 | 21.735215 |
| 22.H | -0.941619 | 5.073542 | 22.714405 |
| 23.H | -0.207501 | 5.518755 | 21.210622 |
| 24.N | -3.344653 | 5.071719 | 21.847852 |
| 25.H | -3.308206 | 4.797719 | 22.824635 |
| 26.H | -4.257098 | 5.103771 | 21.405766 |
| 27.C | -0.853381 | 6.545782 | 17.433574 |

## Electronic supplementary information

|      |           |           |           |
|------|-----------|-----------|-----------|
| 28.C | -2.245425 | 5.359253  | 21.151669 |
| 29.C | -1.167272 | 8.187427  | 15.717647 |
| 30.H | -1.335395 | 9.224356  | 15.418520 |
| 31.C | -1.078988 | 7.890894  | 17.079998 |
| 32.C | -0.737174 | 6.131607  | 18.872487 |
| 33.H | -0.152445 | 5.208290  | 18.969847 |
| 34.H | -0.323846 | 6.933467  | 19.497857 |
| 35.C | -1.204871 | 8.983163  | 18.108558 |
| 36.H | -0.270205 | 9.115778  | 18.675325 |
| 37.H | -1.433352 | 9.942374  | 17.630791 |
| 38.H | -2.003846 | 8.776827  | 18.836416 |
| 39.H | -1.194574 | 10.083162 | 5.554484  |
| 40.H | -1.138970 | 8.351523  | 5.212261  |
| 41.H | 0.364875  | 9.324761  | 5.093435  |
| 42.O | 5.422445  | 8.860125  | 12.484963 |
| 43.O | 3.638074  | 8.020550  | 11.387494 |
| 44.C | 4.353880  | 8.986962  | 11.857023 |
| 45.C | 3.850033  | 10.421603 | 11.587270 |
| 46.H | 4.014086  | 11.045400 | 12.475162 |
| 47.H | 2.792995  | 10.455675 | 11.293244 |
| 48.H | 4.446652  | 10.853470 | 10.770115 |
| 49.O | 0.901119  | 8.876133  | 7.519694  |
| 50.O | -1.335642 | 8.713057  | 7.851892  |
| 51.C | -0.297950 | 8.901625  | 7.128028  |
| 52.C | -0.569372 | 9.184182  | 5.647771  |

### **1o\_Cl**

|      |           |           |           |
|------|-----------|-----------|-----------|
| 1.Cl | -4.718250 | 4.287546  | -6.027589 |
| 2.Cl | 4.718250  | -4.287546 | 6.027589  |
| 3.S  | 2.494631  | -0.810308 | 2.876262  |

## Electronic supplementary information

|      |           |           |           |
|------|-----------|-----------|-----------|
| 4.N  | 2.758400  | -3.267039 | 4.042793  |
| 5.H  | 3.294863  | -3.897705 | 4.727007  |
| 6.H  | 1.902563  | -3.556909 | 3.589788  |
| 7.N  | 4.296745  | -1.680100 | 4.609529  |
| 8.H  | 4.707095  | -2.424387 | 5.249566  |
| 9.H  | 4.709975  | -0.763452 | 4.491964  |
| 10.C | 3.223257  | -2.034887 | 3.915716  |
| 11.C | 0.586393  | -0.856145 | 0.939654  |
| 12.C | 1.151714  | -0.769204 | -0.348309 |
| 13.C | 0.539009  | 0.090858  | -1.262803 |
| 14.H | 0.959475  | 0.171209  | -2.267944 |
| 15.C | 1.178510  | -1.756689 | 1.988709  |
| 16.H | 1.644198  | -2.643976 | 1.541223  |
| 17.H | 0.413247  | -2.054575 | 2.716851  |
| 18.C | 2.359472  | -1.572504 | -0.748941 |
| 19.H | 3.200639  | -1.415676 | -0.058269 |
| 20.H | 2.695021  | -1.298043 | -1.755803 |
| 21.H | 2.140647  | -2.651660 | -0.758157 |
| 22.S | -2.494631 | 0.810308  | -2.876262 |
| 23.N | -2.758400 | 3.267039  | -4.042793 |
| 24.H | -3.294863 | 3.897705  | -4.727007 |
| 25.H | -1.902563 | 3.556909  | -3.589788 |
| 26.N | -4.296745 | 1.680100  | -4.609529 |
| 27.H | -4.707095 | 2.424387  | -5.249566 |
| 28.H | -4.709975 | 0.763452  | -4.491964 |
| 29.C | -3.223257 | 2.034887  | -3.915716 |
| 30.C | -0.586393 | 0.856145  | -0.939654 |
| 31.C | -1.151714 | 0.769204  | 0.348309  |
| 32.C | -0.539009 | -0.090858 | 1.262803  |
| 33.H | -0.959475 | -0.171209 | 2.267944  |

## Electronic supplementary information

|      |           |          |           |
|------|-----------|----------|-----------|
| 34.C | -1.178510 | 1.756689 | -1.988709 |
| 35.H | -1.644198 | 2.643976 | -1.541223 |
| 36.H | -0.413247 | 2.054575 | -2.716851 |
| 37.C | -2.359472 | 1.572504 | 0.748941  |
| 38.H | -3.200639 | 1.415676 | 0.058269  |
| 39.H | -2.695021 | 1.298043 | 1.755803  |
| 40.H | -2.140647 | 2.651660 | 0.758157  |

## **1o\_U**

|      |            |          |           |
|------|------------|----------|-----------|
| 1.C  | -7.405672  | 6.818925 | -0.847804 |
| 2.O  | -6.895708  | 3.678818 | -3.225694 |
| 3.O  | -8.532793  | 3.545791 | -4.698766 |
| 4.O  | -10.493596 | 5.532381 | -4.803970 |
| 5.O  | -10.473415 | 7.180114 | -3.330079 |
| 6.O  | -9.674710  | 4.536251 | -2.018672 |
| 7.O  | -7.633141  | 6.491784 | -4.263136 |
| 8.C  | -6.841702  | 1.825352 | -4.791802 |
| 9.H  | -7.520569  | 1.356410 | -5.511552 |
| 10.H | -5.904870  | 2.089042 | -5.305462 |
| 11.H | -6.601751  | 1.116193 | -3.987346 |
| 12.C | -7.465791  | 3.074449 | -4.218557 |
| 13.C | -6.771516  | 7.488798 | 0.346579  |
| 14.H | -6.884982  | 6.844206 | 1.231029  |
| 15.H | -5.696640  | 7.634815 | 0.170008  |
| 16.H | -7.250794  | 8.453702 | 0.541919  |
| 17.C | -12.262881 | 7.181337 | -4.952640 |
| 18.H | -13.082546 | 7.132611 | -4.221152 |
| 19.H | -12.099065 | 8.241186 | -5.189738 |
| 20.H | -12.542635 | 6.627450 | -5.855428 |
| 21.C | -11.015279 | 6.601468 | -4.335607 |

## Electronic supplementary information

|      |           |           |           |
|------|-----------|-----------|-----------|
| 22.H | 12.099065 | -8.241186 | 5.189738  |
| 23.H | 12.542635 | -6.627450 | 5.855428  |
| 24.C | 11.015279 | -6.601468 | 4.335607  |
| 25.N | 4.546187  | -3.036395 | 2.153042  |
| 26.H | 5.486696  | -3.307869 | 2.588956  |
| 27.H | 3.923383  | -2.449666 | 2.695489  |
| 28.N | 4.867182  | -4.324000 | 0.257269  |
| 29.H | 5.684321  | -4.871817 | 0.669787  |
| 30.H | 4.580927  | -4.525522 | -0.695444 |
| 31.C | 4.159578  | -3.442128 | 0.952753  |
| 32.C | 1.076597  | -0.673245 | 0.591152  |
| 33.S | 2.670247  | -2.858303 | 0.188329  |
| 34.C | 2.195133  | -1.421133 | 1.263949  |
| 35.H | 1.860210  | -1.812655 | 2.234043  |
| 36.H | 3.085823  | -0.791110 | 1.388738  |
| 37.C | -0.245779 | -0.994000 | 0.921264  |
| 38.H | -0.429909 | -1.782195 | 1.655930  |
| 39.C | -1.342938 | -0.339683 | 0.353684  |
| 40.C | -2.746248 | -0.728082 | 0.738742  |
| 41.H | -3.331327 | 0.140800  | 1.075159  |
| 42.H | -2.738638 | -1.464758 | 1.551471  |
| 43.H | -3.285568 | -1.179258 | -0.109781 |
| 44.N | -4.546187 | 3.036395  | -2.153042 |
| 45.H | -5.486696 | 3.307869  | -2.588956 |
| 46.H | -3.923383 | 2.449666  | -2.695489 |
| 47.N | -4.867182 | 4.324000  | -0.257269 |
| 48.H | -5.684321 | 4.871817  | -0.669787 |
| 49.H | -4.580927 | 4.525522  | 0.695444  |
| 50.C | -4.159578 | 3.442128  | -0.952753 |
| 51.C | -1.076597 | 0.673245  | -0.591152 |



## Electronic supplementary information

|      |           |           |           |
|------|-----------|-----------|-----------|
| 52.S | -2.670247 | 2.858303  | -0.188329 |
| 53.C | -2.195133 | 1.421133  | -1.263949 |
| 54.H | -1.860210 | 1.812655  | -2.234043 |
| 55.H | -3.085823 | 0.791110  | -1.388738 |
| 56.C | 0.245779  | 0.994000  | -0.921264 |
| 57.H | 0.429909  | 1.782195  | -1.655930 |
| 58.C | 1.342938  | 0.339683  | -0.353684 |
| 59.C | 2.746248  | 0.728082  | -0.738742 |
| 60.H | 3.331327  | -0.140800 | -1.075159 |
| 61.H | 2.738638  | 1.464758  | -1.551471 |
| 62.H | 3.285568  | 1.179258  | 0.109781  |
| 63.C | 6.841702  | -1.825352 | 4.791802  |
| 64.H | 7.520569  | -1.356410 | 5.511552  |
| 65.H | 5.904870  | -2.089042 | 5.305462  |
| 66.H | 6.601751  | -1.116193 | 3.987346  |
| 67.C | 7.465791  | -3.074449 | 4.218557  |
| 68.C | 6.771516  | -7.488798 | -0.346579 |
| 69.U | -8.679828 | 5.527600  | -3.152592 |
| 70.O | -6.908083 | 5.714451  | -1.301621 |
| 71.O | -8.421657 | 7.316740  | -1.408809 |
| 72.C | 12.262881 | -7.181337 | 4.952640  |
| 73.H | 5.696640  | -7.634815 | -0.170008 |
| 74.H | 7.250794  | -8.453702 | -0.541919 |
| 75.H | 13.082546 | -7.132611 | 4.221152  |
| 76.H | 6.884982  | -6.844206 | -1.231029 |
| 77.U | 8.679828  | -5.527600 | 3.152592  |
| 78.O | 6.908083  | -5.714451 | 1.301621  |
| 79.O | 8.421657  | -7.316740 | 1.408809  |
| 80.C | 7.405672  | -6.818925 | 0.847804  |
| 81.O | 6.895708  | -3.678818 | 3.225694  |

## Electronic supplementary information

|      |           |           |          |
|------|-----------|-----------|----------|
| 82.O | 8.532793  | -3.545791 | 4.698766 |
| 83.O | 10.493596 | -5.532381 | 4.803970 |
| 84.O | 10.473415 | -7.180114 | 3.330079 |
| 85.O | 9.674710  | -4.536251 | 2.018672 |
| 86.O | 7.633141  | -6.491784 | 4.263136 |

## 2o\_Cl

|       |           |           |          |
|-------|-----------|-----------|----------|
| 1.H   | 2.630218  | 23.287231 | 6.282823 |
| 2.H   | 2.580802  | 9.192061  | 5.965124 |
| 3.H   | 0.255048  | 19.622639 | 4.015701 |
| 4.H   | 0.736635  | 23.219744 | 5.398045 |
| 5.H   | 3.600950  | 21.784058 | 6.649464 |
| 6.H   | 0.592284  | 9.302265  | 5.321352 |
| 7.Cl  | 1.548490  | 24.940667 | 5.892274 |
| 8.C   | -0.245553 | 16.987566 | 5.984285 |
| 9.C   | 1.694548  | 17.629991 | 2.845295 |
| 10.C  | 1.783513  | 21.517251 | 5.759237 |
| 11.H  | -0.535101 | 13.039757 | 5.728132 |
| 12.N  | 0.711621  | 22.149853 | 5.309495 |
| 13.C  | 1.024897  | 16.970561 | 3.909696 |
| 14.C  | 0.322583  | 14.851040 | 4.980789 |
| 15.S  | 1.874697  | 12.734904 | 5.705315 |
| 16.C  | 0.385908  | 17.685395 | 4.972358 |
| 17.H  | 1.608709  | 13.746199 | 2.831364 |
| 18.C  | 2.286668  | 16.920472 | 1.823298 |
| 19.H  | -0.424741 | 19.536687 | 5.677629 |
| 20.H  | 0.100573  | 12.902278 | 4.052550 |
| 21.H  | 1.754115  | 18.717851 | 2.836024 |
| 22.C  | 1.681730  | 10.984537 | 5.644040 |
| 23.Cl | 1.451001  | 7.560133  | 5.645350 |

## Electronic supplementary information

|      |           |           |          |
|------|-----------|-----------|----------|
| 24.N | 2.773511  | 22.232817 | 6.277144 |
| 25.H | 3.616702  | 10.676879 | 6.212973 |
| 26.C | 0.378629  | 19.188490 | 5.016870 |
| 27.H | -0.784092 | 15.064845 | 6.804245 |
| 28.H | -0.283558 | 10.892290 | 5.092678 |
| 29.N | 2.729795  | 10.246185 | 5.983590 |
| 30.C | 0.263023  | 13.349589 | 5.042100 |
| 31.S | 1.987696  | 19.766950 | 5.718521 |
| 32.C | 1.613978  | 14.835475 | 2.843243 |
| 33.C | -0.274435 | 15.582156 | 5.990007 |
| 34.H | -0.060501 | 21.652982 | 4.887342 |
| 35.H | -0.736014 | 17.532054 | 6.792546 |
| 36.H | 2.792419  | 17.449707 | 1.015468 |
| 37.C | 2.244060  | 15.511183 | 1.821044 |
| 38.C | 0.987594  | 15.530688 | 3.910911 |
| 39.N | 0.562477  | 10.374657 | 5.287076 |
| 40.H | 2.714966  | 14.954857 | 1.010327 |

## **2o\_U**

|      |          |           |           |
|------|----------|-----------|-----------|
| 1.U  | 5.900862 | 1.501776  | 28.334842 |
| 2.O  | 6.662087 | 0.455396  | 26.177408 |
| 3.O  | 4.235475 | 0.443343  | 29.792597 |
| 4.O  | 4.610957 | 2.401601  | 27.457697 |
| 5.O  | 7.231407 | 0.647409  | 29.196632 |
| 6.O  | 7.585348 | 2.408097  | 26.607945 |
| 7.C  | 7.443626 | 1.381958  | 25.838762 |
| 8.C  | 8.207681 | 1.314831  | 24.538873 |
| 9.H  | 8.081456 | 0.333900  | 24.071051 |
| 10.H | 9.274160 | 1.508914  | 24.714726 |
| 11.H | 7.830111 | 2.087960  | 23.854354 |
| 12.O | 4.735509 | -0.615943 | 27.923069 |
| 13.C | 3.056527 | -1.616880 | 29.339892 |

## Electronic supplementary information

|      |           |           |           |
|------|-----------|-----------|-----------|
| 14.H | 2.876059  | -1.653616 | 30.419580 |
| 15.H | 3.395449  | -2.589897 | 28.966418 |
| 16.H | 2.108833  | -1.374173 | 28.837581 |
| 17.C | 4.064886  | -0.546782 | 29.006464 |
| 18.O | 5.457257  | 2.907767  | 30.372729 |
| 19.O | 6.995956  | 3.720855  | 29.023240 |
| 20.C | 6.300241  | 3.804159  | 30.106469 |
| 21.C | 6.518461  | 4.966068  | 31.044238 |
| 22.H | 5.747443  | 4.980838  | 31.820421 |
| 23.H | 6.508048  | 5.912860  | 30.488356 |
| 24.H | 7.503128  | 4.864842  | 31.523119 |
| 25.S | 10.507096 | 6.797730  | 26.700162 |
| 26.S | 15.927020 | 11.144396 | 25.112494 |
| 27.C | 10.679852 | 9.163671  | 24.071991 |
| 28.H | 9.838778  | 8.519874  | 24.326907 |
| 29.C | 12.006770 | 8.686821  | 24.236664 |
| 30.C | 12.292165 | 7.366194  | 24.707939 |
| 31.C | 11.191509 | 6.393005  | 25.029454 |
| 32.H | 11.591275 | 5.372824  | 25.069035 |
| 33.H | 10.379982 | 6.451617  | 24.291369 |
| 34.C | 14.442520 | 9.100762  | 24.071124 |
| 35.C | 13.098924 | 9.567840  | 23.913158 |
| 36.C | 12.799437 | 10.873231 | 23.442846 |
| 37.H | 13.610550 | 11.561480 | 23.208638 |
| 38.C | 13.604723 | 6.962913  | 24.861979 |
| 39.H | 13.823691 | 5.956844  | 25.222113 |
| 40.C | 14.670999 | 7.823215  | 24.545731 |
| 41.H | 15.694461 | 7.466076  | 24.667409 |
| 42.C | 11.497872 | 11.298943 | 23.291615 |
| 43.H | 11.293824 | 12.306410 | 22.929101 |
| 44.C | 10.428578 | 10.436868 | 23.609380 |
| 45.H | 9.400727  | 10.779965 | 23.491840 |
| 46.N | 9.058173  | 4.575447  | 26.103962 |
| 47.H | 8.460607  | 3.714932  | 26.314981 |

## Electronic supplementary information

|       |           |           |           |
|-------|-----------|-----------|-----------|
| 48.H  | 9.347655  | 4.726975  | 25.146568 |
| 49.N  | 8.974172  | 5.359730  | 28.275855 |
| 50.H  | 8.195540  | 4.695261  | 28.572117 |
| 51.H  | 9.351534  | 5.998725  | 28.966367 |
| 52.C  | 9.420302  | 5.446760  | 27.031034 |
| 53.C  | 15.621929 | 9.966036  | 23.720960 |
| 54.H  | 15.441958 | 10.545865 | 22.806038 |
| 55.H  | 16.515432 | 9.341575  | 23.599885 |
| 56.N  | 17.924039 | 11.864942 | 23.388595 |
| 57.H  | 18.764470 | 12.502345 | 23.190083 |
| 58.H  | 17.624706 | 11.138524 | 22.753372 |
| 59.N  | 17.778977 | 13.018504 | 25.349275 |
| 60.H  | 18.625678 | 13.557639 | 24.992637 |
| 61.H  | 17.335692 | 13.207990 | 26.239250 |
| 62.C  | 17.319291 | 12.066303 | 24.548342 |
| 63.Cl | 20.036223 | 13.941769 | 23.616420 |
